# Supplementary material
Source: PubMed Central journal article supplement (PMC240717)

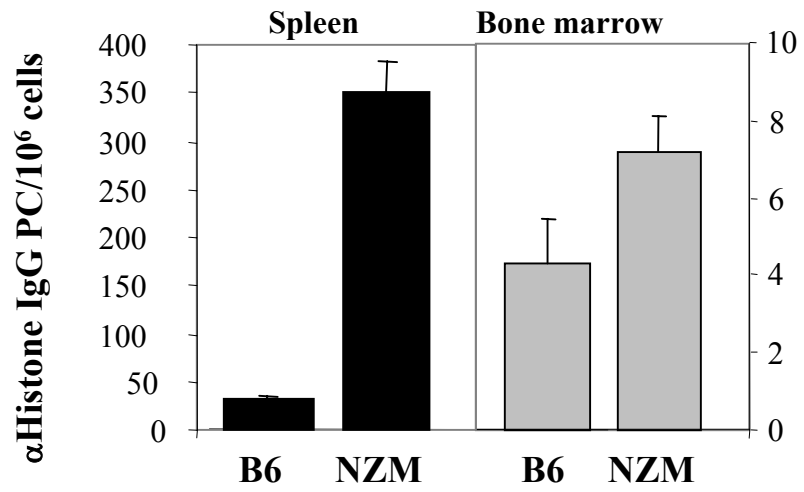

Supplement: pnas_100_22_12905__2.pdf [file pnas_100_22_12905__2.pdf]

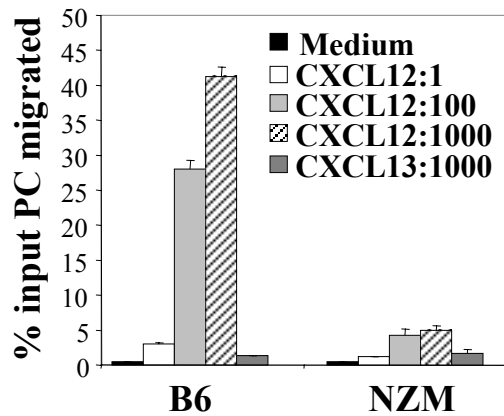

Supplement: pnas_100_22_12905__4.pdf [file pnas_100_22_12905__4.pdf]
